# Supplementary material
Source: MDPI journal article supplement (https://www.mdpi.com/2312-7481/3/4/32)
Supplement: s1 [file s1]

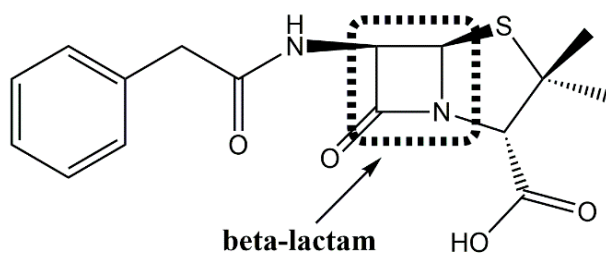

**Figure S1.** Schematic structure of penicillin G.

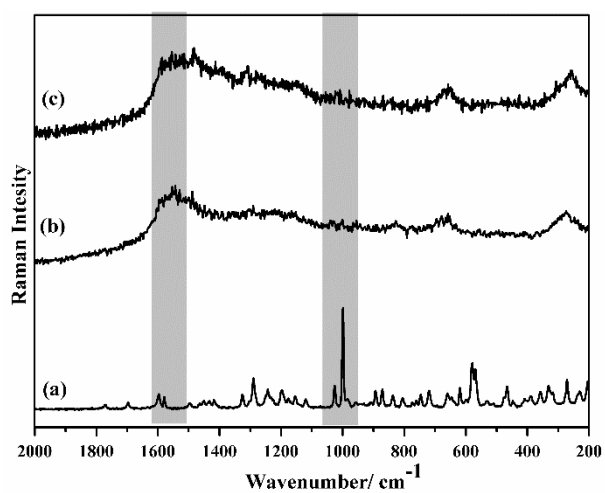

**Figure S2.** (a) Raman spectra of powdered PG solid and (b) of MNP(102) substrates; (c) control SERS experiment on MNP substrates and using a solution  $10^{-4}$  M in the analyte. Excitation line 633 nm.
